# Supplementary material
Source: PubMed Central journal article supplement (PMC8289629)
Supplement: mmc1.pdf [file mmc1.pdf]

**Supplemental information**

**Development of safe and highly  
protective live-attenuated SARS-CoV-2  
vaccine candidates by genome recoding**

**Jakob Trimpert, Kristina Dietert, Theresa C. Firsching, Nadine Ebert, Tran Thi Nhu Thao, Daria Vladimirova, Susanne Kaufer, Fabien Labroussaa, Azza Abdelgawad, Anel  Conradie, Thomas H fner, Julia M. Adler, Luca D. Bertzbach, Joerg Jores, Achim D. Gruber, Volker Thiel, Nikolaus Osterrieder, and Dusan Kunec**

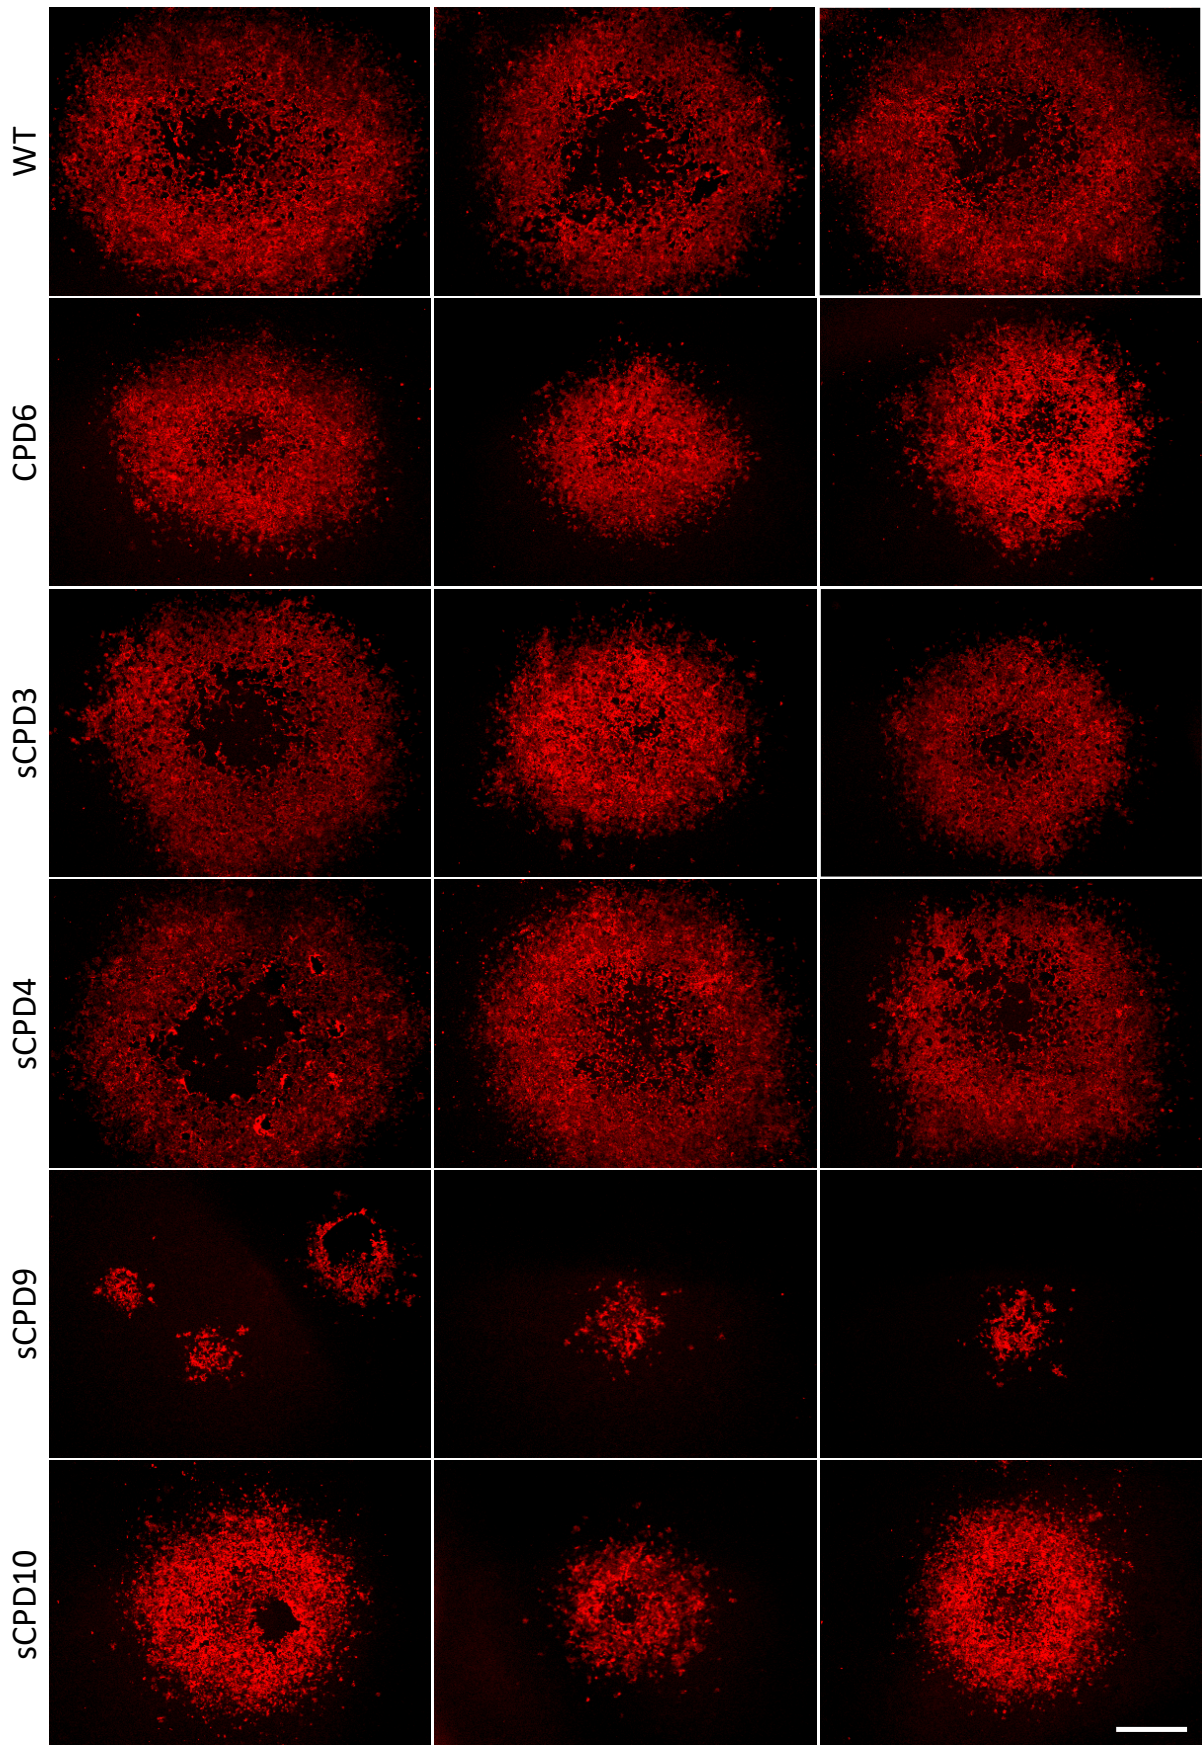

Figure S1. Representative images of virus foci formed by the parental SARS-CoV-2 (WT) and recoded viruses. Related to Figure 2. Bar, 1 mm.

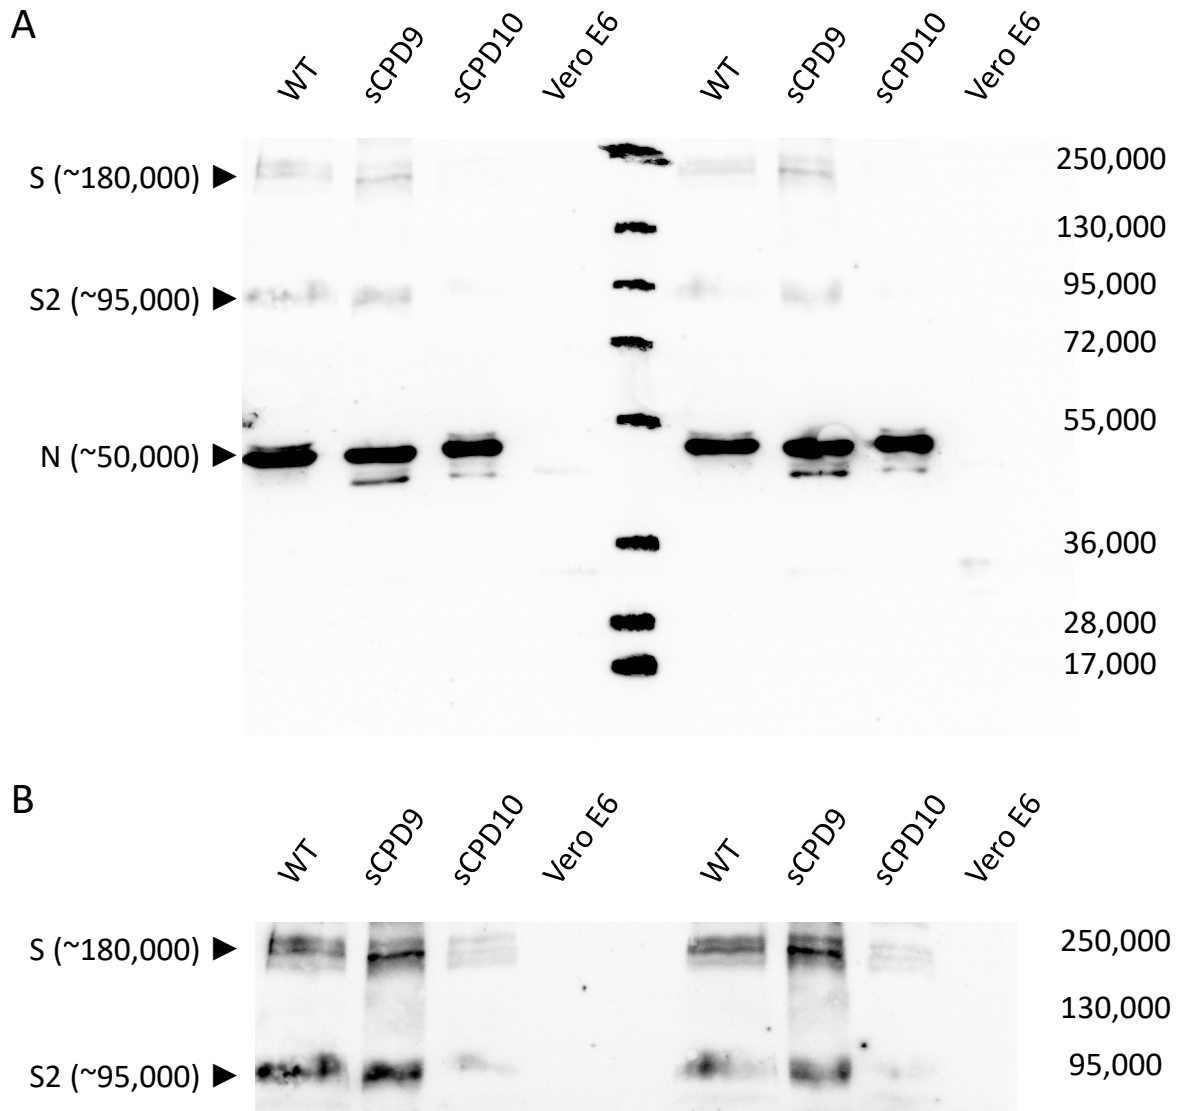

**Figure S2. sCPD10 virus produces less spike protein in infected Vero E6 cells than parental or sCPD9 viruses. Related to Figures 1 and 2.**

(A) Western blot analysis of viral protein production in infected cells by SARS-CoV-2 (WT), sCPD9 and sCPD10 viruses. Vero E6 cells were infected with WT, sCPD9 or sCPD10 viruses. After 48 h, infected cells were lysed, cell lysates separated by SDS-PAGE under reducing conditions, and proteins were transferred to PVDF membranes. Membranes were cut into two parts. The upper membrane part, containing proteins with higher molecular weight, was incubated with a mouse monoclonal anti-S antibody. Note that the antibody binds to the S2 subunit of the spike protein and thus can recognize both the uncleaved spike protein (MW ~180,000) and its S2 subunit (MW ~95,000). The lower membrane part containing lower molecular weight proteins was incubated with a mouse monoclonal antibody recognizing the N protein (MW ~90,000).

(B) The image of the upper part of the membrane containing the uncleaved spike protein and its subunits, obtained after a longer exposure. Data are representative of three independent experiments.

**Table S1. Properties of the parental (WT) and recoded, codon pair deoptimized (CPD) sequences. Related to Figure 1.**

| Sequence | Length (bp)           | Codons | GC (%) | CPS (WT) | CPS (CPD) | UpA (WT) | UpA (CPD) | CpG (WT) | CpG (CPD) |
|----------|-----------------------|--------|--------|----------|-----------|----------|-----------|----------|-----------|
| CPD2     | 2,007                 | 669    | 39.0   | 0.054    | -0.361    | 118      | 195       | 27       | 107       |
| CPD3     | 2,676                 | 892    | 36.5   | 0.070    | -0.282    | 227      | 324       | 20       | 109       |
| CPD4     | 2,400                 | 800    | 34.4   | 0.029    | -0.297    | 239      | 317       | 31       | 105       |
| CPD5     | 2,667                 | 889    | 36.6   | 0.041    | -0.307    | 253      | 335       | 20       | 115       |
| CPD6     | 1,836 (1,482 + 354)   | 612    | 39.5   | 0.036    | -0.337    | 152      | 225       | 25       | 94        |
| CPD7     | 2,790                 | 930    | 37.5   | 0.042    | -0.323    | 250      | 347       | 41       | 162       |
| CPD8     | 2,406                 | 802    | 37.9   | 0.059    | -0.344    | 205      | 293       | 26       | 132       |
| CPD9     | 2,508 (1,146 + 1,362) | 836    | 34.8   | 0.056    | -0.321    | 221      | 310       | 26       | 116       |
| CPD10    | 2,046                 | 682    | 38.6   | 0.099    | -0.302    | 123      | 216       | 16       | 110       |
| sCPD3    | 999                   | 333    | 36.8   | 0.077    | -0.294    | 76       | 122       | 11       | 42        |
| sCPD4    | 999                   | 333    | 34.0   | 0.014    | -0.278    | 114      | 143       | 11       | 34        |
| sCPD5    | 999                   | 333    | 35.8   | 0.035    | -0.320    | 91       | 127       | 6        | 44        |
| sCPD8    | 1,011                 | 337    | 36.4   | 0.094    | -0.302    | 88       | 119       | 7        | 54        |
| sCPD9    | 1,146                 | 382    | 34.4   | 0.056    | -0.302    | 104      | 138       | 14       | 51        |
| sCPD10   | 999                   | 333    | 38.1   | 0.109    | -0.340    | 51       | 103       | 5        | 49        |

WT and CPD sequences contain exactly the same codons, but the position of the synonymous codons in the corresponding sequences is different. CPD increases the number of UpA and CpG dinucleotides in deoptimized sequences. Length, length of recoded sequences in recoded fragments; GC, GC-content; CPS, average codon pair score of the WT and CPD sequences; UpA and CpG, number of UpA and CpG dinucleotides.

**Table S2. The most relevant ongoing clinical trials registered with ClinicalTrials.gov. Related to Figure 1.**

| Identifier                                   | Sponsor/Institution                                                            | Vaccine                                         |
|----------------------------------------------|--------------------------------------------------------------------------------|-------------------------------------------------|
| <b>Non-replicating virus vector vaccines</b> |                                                                                |                                                 |
| NCT04530396                                  | Gamaleya Research Institute of Epidemiology and Microbiology                   | Sputnik V                                       |
| NCT04741061                                  | Gamaleya Research Institute of Epidemiology and Microbiology                   | Sputnik-Light                                   |
| NCT04516746                                  | AstraZeneca                                                                    | AZD1222                                         |
| NCT04536051                                  | AstraZeneca                                                                    | AZD1222                                         |
| NCT04341389                                  | Institute of Biotechnology, Academy of Military Medical Sciences, PLA of China | Ad5-nCoV vaccine                                |
| NCT04526990                                  | CanSino Biologics Inc.                                                         | Ad5-nCoV                                        |
| NCT04840992                                  | CanSino Biologics Inc.                                                         | Ad5-nCoV                                        |
| NCT04614948                                  | Janssen Vaccines & Prevention B.V.                                             | d26.COVS.2                                      |
| NCT04838795                                  | Janssen Vaccines & Prevention B.V.                                             | d26.COVS.2                                      |
| NCT04791423                                  | ReiThera Srl                                                                   | GRAd-COV2                                       |
| <b>mRNA vaccines</b>                         |                                                                                |                                                 |
| NCT04754594                                  | BioNTech SE                                                                    | mRNA vaccine BNT162b2                           |
| NCT04368728                                  | BioNTech SE                                                                    | mRNA vaccines BNT162b1, BNT162b2 and BNT162b2SA |
| NCT04813796                                  | ModernaTX, Inc.                                                                | mRNA-1283 and mRNA-1273 vaccines                |
| NCT04785144                                  | ModernaTX, Inc.                                                                | mRNA-1273.351 vaccine                           |
| NCT04811664                                  | National Institute of Allergy and Infectious Diseases                          | mRNA-1273 vaccine                               |
| NCT04470427                                  | ModernaTX, Inc.                                                                | mRNA-1273 vaccine                               |
| NCT04796896                                  | ModernaTX, Inc.                                                                | mRNA-1273 vaccine                               |
| NCT04649151                                  | ModernaTX, Inc.                                                                | mRNA-1273 vaccine                               |
| NCT04652102                                  | CureVac AG                                                                     | mRNA vaccine CVnCoV                             |
| NCT04860258                                  | CureVac AG                                                                     | mRNA vaccine CVnCoV                             |
| NCT04674189                                  | CureVac AG                                                                     | mRNA vaccine CVnCoV                             |
| NCT04847102                                  | Walvax Biotechnology Co., Ltd.                                                 | mRNA vaccine ARCoV                              |
| <b>Inactivated or subunit virus vaccines</b> |                                                                                |                                                 |
| NCT04582344                                  | Health Institutes of Turkey, Sinovac                                           | inactivated SARS-CoV-2                          |
| NCT04747821                                  | Butantan Institute, Sinovac                                                    | inactivated SARS-CoV-2                          |
| NCT04659239                                  | Chinese Academy of Medical Sciences                                            | inactivated SARS-CoV-2                          |
| NCT04510207                                  | China National Biotec Group Company                                            | inactivated SARS-CoV-2, BBIBP-CorV              |
| NCT04560881                                  | Laboratorio Elea Phoenix S.A.                                                  | inactivated SARS-CoV-2, BBIBP-CorV              |
| NCT04611802                                  | Novavax                                                                        | SARS-CoV-2 rS with Matrix-M1 adjuvant           |
| NCT04583995                                  | Novavax                                                                        | SARS-CoV-2 rS with Matrix-M1 adjuvant           |
| NCT04636697                                  | Medicago                                                                       | recombinant coronavirus-like particle CoVLP     |
| NCT04852705                                  | Shenzhen Kangtai Biological Products Co.                                       | inactivated SARS-CoV-2                          |
| NCT04641481                                  | Bharat Biotech International Ltd.                                              | BBV152                                          |
| NCT04683224                                  | Vaxxinity, Inc.                                                                | subunit vaccine UB-612                          |
| <b>Live attenuated virus vaccines</b>        |                                                                                |                                                 |
| NCT04619628                                  | Codagenix, Inc                                                                 | COVI-VAC                                        |
